# Supplementary material for: Effects of surface tension time-evolution for CCN activation of a complex organic surfactant
Source: Royal Society of Chemistry journal article supplement (doi:10.1039/c9em00426b), 2019-12-20
Supplement: c9em00426b1.pdf [file c9em00426b1.pdf]

# Supplementary Information for “Effects of surface tension time-evolution for CCN activation of a complex organic surfactant”

Jack J. Lin, Thomas B. Kristensen,  
Silvia M. Calderón, Jussi Malila, and Nønne L. Prisle

20 September 2019

## S1 3D surface tension parameterizations

Surface tension measurements and the surface fits to those measurements are shown in Figs. S1–S4 for  $t = 0, 400, 600,$  and  $800$  s. These figures correspond to Fig. 1 in the main text.

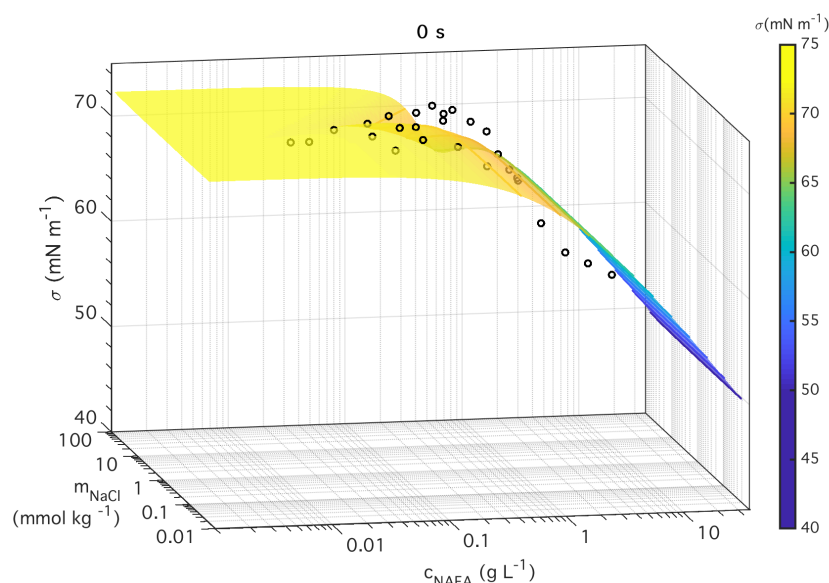

Figure S1: Time-dependent surface tension measurements and fit to measurements for  $t = 0$  s.

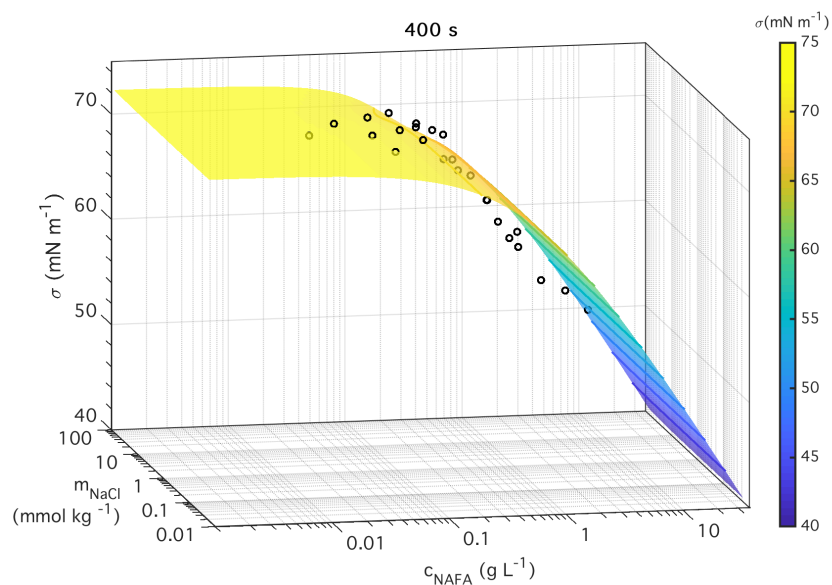

Figure S2: Time-dependent surface tension measurements and fit to measurements for  $t = 400$  s.

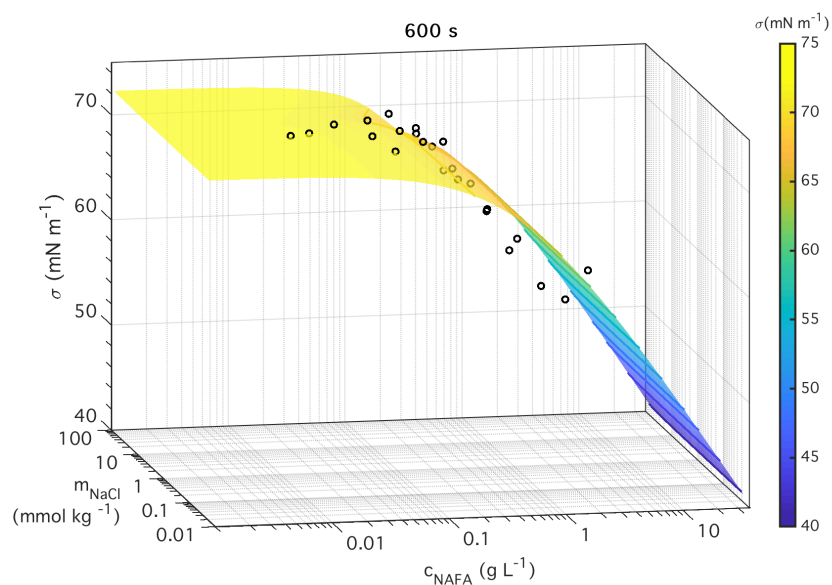

Figure S3: Time-dependent surface tension measurements and fit to measurements for  $t = 600$  s.

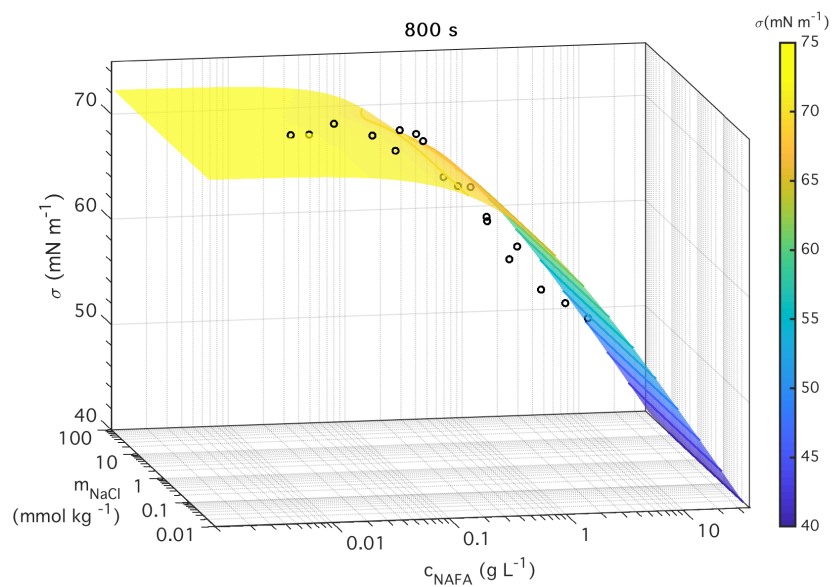

Figure S4: Time-dependent surface tension measurements and fit to measurements for  $t = 800$  s.

The residuals for the surface fits of the surface tension measurements for all times steps  $t = 0, 200, 400, 600, 800$ , and  $1000$  s are shown in Fig. S5.

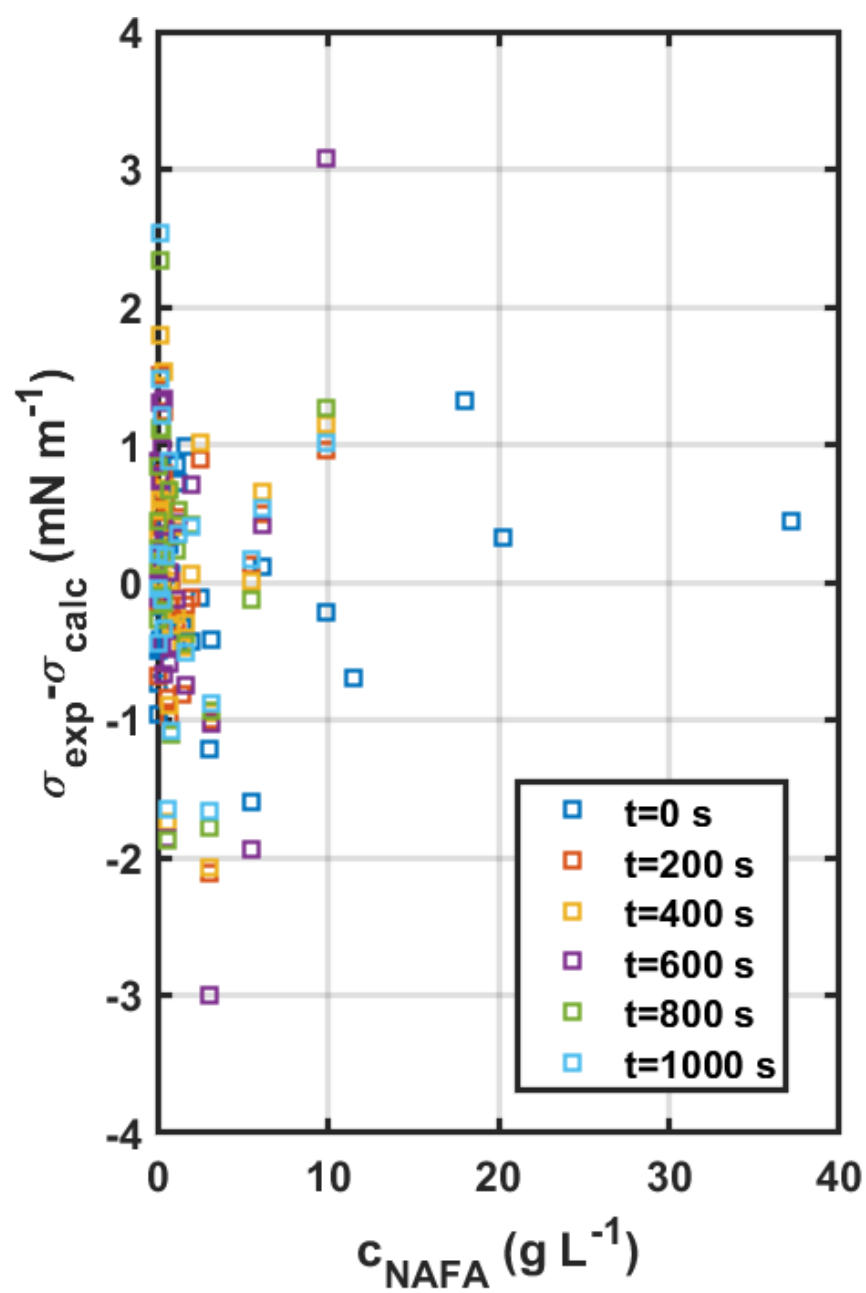

Figure S5: Time-dependent surface tension measurements and fit to measurements for  $t = 800$  s.

## S2 2D surface tension parameterizations

To help clarify the surface tension parameterization plots in Fig. 1 of the main text and Figs. S1–S4, the surface tension fits as only a function of NAFA concentration are shown in Figs. S6–S11 for all times  $t = 0, 200, 400, 600, 800,$  and  $1000$  s. For each figure, the fits are plotted for four different NaCl concentrations.

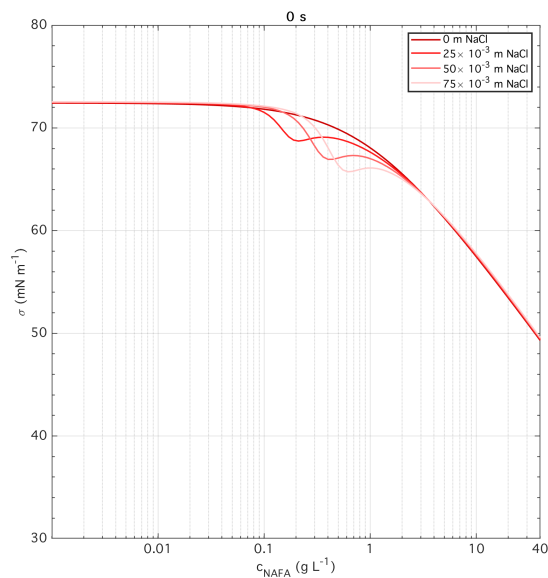

Figure S6: Time-dependent surface tension measurements and fit to measurements as a function of only NAFA concentration for  $t = 0$  s.

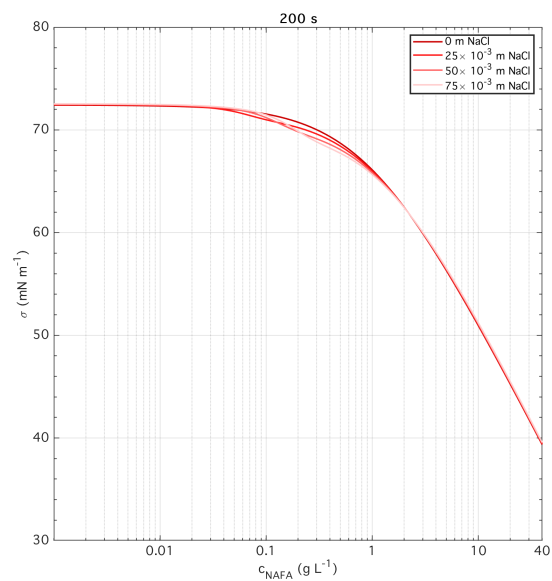

Figure S7: Time-dependent surface tension measurements and fit to measurements as a function of only NAFA concentration for  $t = 400$  s.

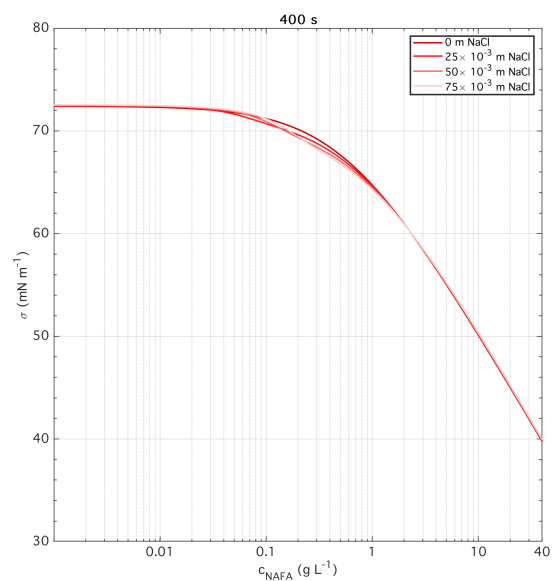

Figure S8: Time-dependent surface tension measurements and fit to measurements as a function of only NAFA concentration for  $t = 400$  s.

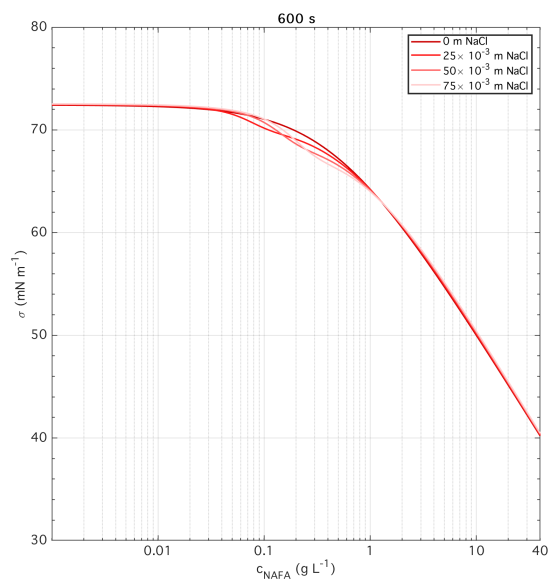

Figure S9: Time-dependent surface tension measurements and fit to measurements as a function of only NAFA concentration for  $t = 600$  s.

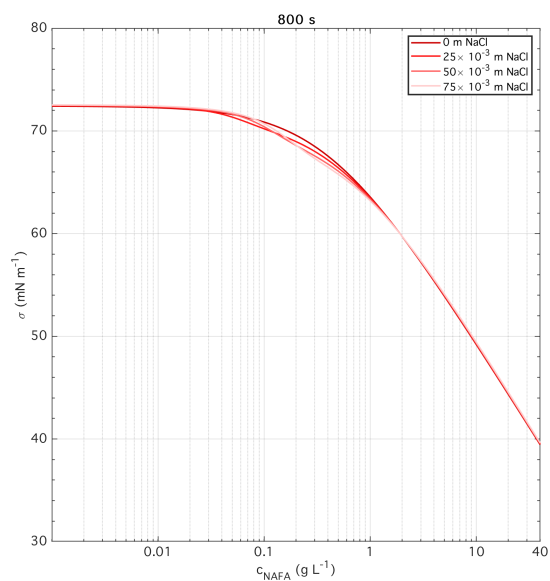

Figure S10: Time-dependent surface tension measurements and fit to measurements as a function of only NAFA concentration for  $t = 800$  s.

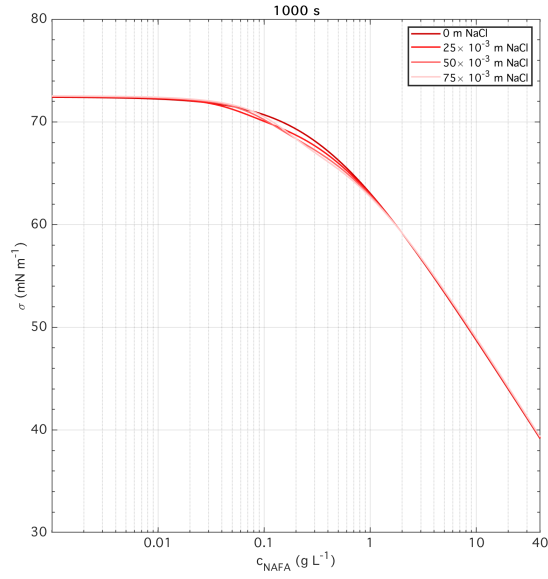

Figure S11: Time-dependent surface tension measurements and fit to measurements as a function of only NAFA concentration for  $t = 1000$  s.

### S3 Time change of pure NAFA surface tension

The surface tension measurements and fits of pure NAFA as a function of total NAFA concentration is shown in Fig. S12 for all times  $t = 0, 200, 400, 600, 800,$  and  $1000$  s.



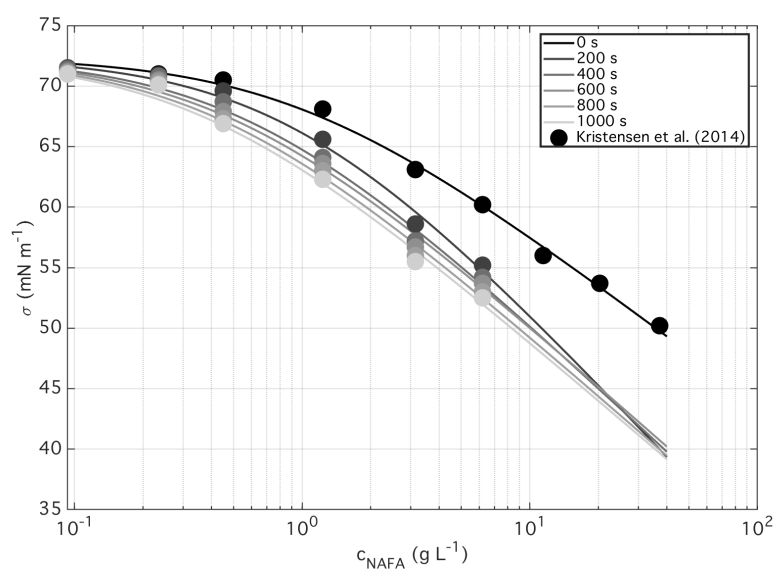

Figure S12: Surface tension measurements and fits for pure NAFA as a function of total NAFA concentration.
